# Supplementary material
Source: PubMed Central journal article supplement (PMC4288673)
Supplement: JB.02063-14_zjb999093426so2.pdf [file JB.02063-14_zjb999093426so2.pdf]

## Supplementary Tables and Plasmid Construction

**Table S1: Strains used in this study**

| Strain | Genotype                                                                      | Reference                     |
|--------|-------------------------------------------------------------------------------|-------------------------------|
| BJH001 | PY79 (wild-type)                                                              | (1)                           |
| BQA003 | $\Delta yjbM::erm$                                                            | This work                     |
| BQA006 | $\Delta ywaC::erm$                                                            | This work                     |
| BQA009 | $\Delta relA::spec$                                                           | This work                     |
| BQA010 | $\Delta relA::erm$                                                            | This work                     |
| BQA022 | $\Delta sigD::tet$                                                            | (2)                           |
| BQA046 | $amyE::P_{hag}-lacZ$ (cat)                                                    | This work                     |
| BQA047 | $amyE::P_{lvtA}-lacZ$ (cat)                                                   | This work                     |
| BQA050 | $amyE::P_{lvtA}-lacZ$ (cat), $\Delta relA::spec$                              | This work                     |
| BQA051 | $amyE::P_{lvtA}-lacZ$ (cat), $\Delta relA::spec$                              | This work                     |
| BQA057 | $hag^{HagT209C}$                                                              | This work                     |
| BQA059 | $\Delta relA::spec$ / $\Delta sigD::tet$                                      | This work                     |
| BQA062 | $hag^{HagT209C}$ , $\Delta relA::spec$                                        | This work                     |
| BQA067 | $amyE::P_{relA}-relA$ (spec)                                                  | This work                     |
| BQA068 | $amyE::P_{relA}-relA$ (spec), $\Delta relA::erm$                              | This work                     |
| BQA071 | $amyE::P_{hag}-lacZ$ (cat), $\Delta sigD::tetR$                               | This work                     |
| BQA072 | $amyE::P_{lvtA}-lacZ$ (cat), $\Delta sigD::tetR$                              | This work                     |
| BQA073 | $amyE::P_{hag}-lacZ$ (cat), $sacA::P_{relA}-relA$ (spec), $\Delta relA::erm$  | This work                     |
| BQA074 | $amyE::P_{lvtA}-lacZ$ (cat), $sacA::P_{relA}-relA$ (spec), $\Delta relA::erm$ | This work                     |
| BQA075 | $sacA::P_{relA}-relA$ (spec), $\Delta relA::erm$                              | This work                     |
| BQA076 | $\Delta hag::erm$                                                             | Bacillus Genetic Stock Center |
| BQA080 | $hag^{HagT209C}$ , $amyE::P_{relA}-relA$ (spec), $\Delta relA::spec$          | This work                     |
| BQA081 | $\Delta relA::spec$ , $\Delta yjbM::erm$                                      | This work                     |
| BQA082 | $\Delta relA::spec$ , $\Delta ywaC::erm$                                      | This work                     |
| BQA083 | $amyE::P_{hy}-sigD$ (kan), $\Delta sigD::tet$ , $\Delta relA::erm$            | This work                     |
| BQA084 | $amyE::P_{hag}-lacZ$ (cat), $\Delta sigD::tetR$ , $\Delta relA::spec$         | This work                     |
| BQA085 | $amyE::P_{lvtA}-lacZ$ (cat), $\Delta sigD::tetR$ , $\Delta relA::spec$        | This work                     |
| BQA086 | $amyE::P_{hag}-lacZ$ (cat), $\Delta relA::spec$ , $\Delta yjbM::erm$          | This work                     |
| BQA087 | $amyE::P_{lvtA}-lacZ$ (cat), $\Delta relA::spec$ , $\Delta yjbM::erm$         | This work                     |
| BQA088 | $amyE::P_{hag}-lacZ$ (cat), $\Delta relA::spec$ , $\Delta ywaC::erm$          | This work                     |
| BQA089 | $amyE::P_{lvtA}-lacZ$ (cat), $\Delta relA::spec$ , $\Delta ywaC::erm$         | This work                     |
| DS874  | $amyE::P_{hy}-sigD$ (kan)                                                     | Daniel B. Kearns              |
| EUB004 | $trpC2 \Delta relA::erm$ , $aprE::P_{spac}-relA_{D264G}$ (spec)               | (3)                           |

**Table S2: Plasmids used in this study**

| Plasmid   | Description                                              | Reference                     |
|-----------|----------------------------------------------------------|-------------------------------|
| pDR111    | $amyE::Phyperspank$ (spec) (amp)                         | David Z. Rudner               |
| pMiniMAD2 | $ori^{BSTS}$ (amp) (erm)                                 | (4)                           |
| pDG1661   | $amyE::lacZ$ (cat)                                       | Bacillus Genetic Stock Center |
| pJW053    | $\Delta yjbM::spec$                                      | This work                     |
| pJW054    | $\Delta relA::spec$                                      | This work                     |
| pJW055    | $\Delta yjbM::erm$                                       | This work                     |
| pJW058    | $\Delta relA::erm$                                       | This work                     |
| pJW063    | $\Delta ywaC::spec$                                      | This work                     |
| pJW064    | $\Delta ywaC::erm$                                       | This work                     |
| pKM079    | <i>B. subtilis</i> chromosomal integration vector (spec) | David Z. Rudner               |
| pKM082    | <i>B. subtilis</i> chromosomal integration vector (erm)  | David Z. Rudner               |

|        |                                            |           |
|--------|--------------------------------------------|-----------|
| pQA014 | <i>amyE::P<sub>lytA</sub>-lacZ (cat)</i>   | This work |
| pQA015 | <i>amyE::P<sub>hag</sub>-lacZ (cm)</i>     | This work |
| pQA017 | <i>hag<sup>HagT209C</sup></i>              | This work |
| pQA020 | <i>ΔamyE::P<sub>relA</sub>-relA (spec)</i> | This work |

**Table S3: Oligonucleotides used in this study**

| Primer | Sequence (5' to 3')                       |
|--------|-------------------------------------------|
| oJW052 | GGCCGGCCGTGCTCTTCCTTTCCGCCCTGT            |
| oJW053 | CATGTCGACTCCCCCAATTCCGAACCAGTT            |
| oJW054 | GCAGGATCCGGTAAAGGGGAAGAAGAGCATG           |
| oJW055 | GATGAATTCTCCGCCAGCGCCTTATT                |
| oJW056 | GAACGGCCGGGCTTATTATCGGCTGTCCC             |
| oJW057 | CAAGTCGACTTCGTTCCGCATGGAATCACC            |
| oJW058 | GTCGGATCCTAAAGGGGTTAGAAAAGAGATTAGTTG      |
| oJW059 | CAAGAATTCCCAAGAAAAAGTAACAGATGG            |
| oJW066 | GATCGGCCGTCTTGTCGGCGCGATTAA               |
| oJW067 | AGAGTCGACCATGTTCGTCATCTCCTTTAA            |
| oJW068 | GAAGGATCCTAAAAAAGACGGCACCCA               |
| oJW069 | CTCGAATTCTATGTAGATCATCTATCGGA             |
| oQA063 | CAGTCGAATTCTGAAGGGGATCAAGTGAAGC           |
| oQA064 | GATAAGGATCCCGCTGCAATATTGTGGTTA            |
| oQA065 | CAGTCGAATTCAGTATGCATAGCCGCCAGTT           |
| oQA066 | GATAAGGATCCGCAACCCGAAAGAAGCAATA           |
| oQA077 | AGGAGGAATTCTCTCCGCATTATCCTCACAAAAAAG      |
| oQA078 | GCATCGAAACCGATATCAGCACAATCTGCTGCATTATCTGC |
| oQA079 | GCAGATAATGCAGCAGATTGTGCTGATATCGGTTTCGATGC |
| oQA080 | CTCCTGGTACCTGAGGAATGATTAGGAGATAGAAATTT    |
| oQA094 | CAGTCGAATTCCTTGACGGCAGAAATAAGC            |
| oQA095 | GATAAGGATCCACGACCTCTTCGTCCACTGT           |

### Plasmid and strain construction

\*PY79 genomic was used to amplify PCR products for cloning. All marked deletion strains were confirmed by PCR.

*hag<sup>HagT209C</sup>*. To replace the *hag* gene with a mutant version (T209C), the region upstream of codon 209 of *hag* gene was PCR-amplified using the primer pair oQA77/78 and the region downstream of codon 209 of *hag* gene was PCR-amplified using the primer pair oQA79/80. The two PCR products were used as template for overlap extension PCR with primer pair oQA77/80. The amplified fragment was cut with EcoRI and KpnI and cloned into pMiniMAD cut with the same enzymes. The plasmid pQA017 was introduced to the PY79 background by single cross-over integration,

propagated in the absence selection, and plated on LB agar. Colonies were patched to identify MLS sensitive colonies and the *hag* region was sequenced to identify a strain harboring the mutation.

**pJW053** [ $\Delta yjbM::spec$ ] was generated by cloning PCR product from oJW054 and oJW055 (EcoRI-BamHI) into pKM079, then introducing PCR product from oJW052 and oJW053 (EagI-SalI).

**pJW054** [ $\Delta relA::spec$ ] was generated by cloning PCR product from oJW056 and oJW057 (EagI-SalI) into pKM079, then introducing PCR product from oJW058 and oJW059 (EcoRI-BamHI).

**pJW055** [ $\Delta yjbM::erm$ ] The SalI-BamHI spectinomycin cassette fragment of pJW053 was replaced with the SalI-BamHI fragment from pKM082 encoding the erythromycin resistance cassette (*erm*).

**pJW058** [ $\Delta relA::erm$ ] The SalI-BamHI spectinomycin cassette fragment of pJW054 was replaced with the SalI-BamHI fragment from pKM082 encoding the erythromycin resistance cassette (*erm*).

**pJW063** [ $\Delta ywaC::spec$ ] was generated by cloning PCR product from oJW066 and oJW067 (EagI-SalI) into pKM079, then introducing PCR product from oJW068 and oJW069 (EcoRI-BamHI).

**pJW064** [ $\Delta ywaC::erm$ ] The SalI-BamHI spectinomycin cassette fragment of pJW063 was replaced with the SalI-BamHI fragment from pKM082 encoding the erythromycin resistance cassette (*erm*)

**pQA014** [*amyE::P<sub>lytA</sub>-lacZ (cat)*] was generated in a two-way ligation with a PCR product containing the promoter region of *lytA* (primer pair oQA65/66 and PY79 genomic DNA as template) cut with EcoRI and BamHI and pDG1661 cut with the same enzymes. pDG1661 [*amyE::lacZ (cat)*] is an ectopic integration vector.

**pQA015** [*amyE::P<sub>hag</sub>-lacZ (cm)*] was generated in a two-way ligation with a PCR product containing the promoter region of *hag* (primer pair oQA63/64 and PY79 genomic DNA as template) cut with EcoRI and BamHI and pDG1661 cut with the same enzymes.

**pQA017** [*hag<sup>HagT209C</sup>*] was generated by overlap extension PCR. The region upstream of codon 209 of *hag* gene was PCR-amplified using the primer pair oQA77/78 and the region downstream of codon 209 of *hag* gene was PCR-amplified using the primer pair oQA79/80. The two PCR products were used as template for overlap extension PCR with primer pair oQA77/80. The amplified fragment was cut with EcoRI and KpnI and cloned into pMiniMAD cut with the same enzymes.

**pQA020** [*amyE::P<sub>relA</sub>-relA (spec)*] was generated in a two-way ligation with a PCR product containing the promoter and the coding region of *relA* (primer pair oQA94/95 and PY79 genomic DNA as template) cut with EcoRI and BamHI and pDR111 cut with the same enzymes.

#### REFERENCES

1. **Youngman PJ, Perkins JB, Losick R.** 1983. Genetic transposition and insertional mutagenesis in *Bacillus subtilis* with *Streptococcus faecalis* transposon Tn917. *Proceedings of the National Academy of Sciences of the United States of America* **80**:2305-2309.
2. **Kearns DB, Losick R.** 2005. Cell population heterogeneity during growth of *Bacillus subtilis*. *Genes & development* **19**:3083-3094.

3. **Nanamiya H, Kasai K, Nozawa A, Yun CS, Narisawa T, Murakami K, Natori Y, Kawamura F, Tozawa Y.** 2008. Identification and functional analysis of novel (p)ppGpp synthetase genes in *Bacillus subtilis*. *Molecular microbiology* **67**:291-304.
4. **Patrick JE, Kearns DB.** 2008. MinJ (YvjD) is a topological determinant of cell division in *Bacillus subtilis*. *Molecular microbiology* **70**:1166-1179.
